# Supplementary material for: Oral Microbiota, a Potential Determinant for the Treatment Efficacy of Gastric Helicobacter Pylori Eradication in Humans
Source: PubMed Central journal article supplement — Pol J Microbiol. 2022 May 31;71(2):227–39. doi: 10.33073/pjm-2022-020 (PMC9252142; doi:10.33073/pjm-2022-020), 2022-05-31
Supplement: pjm-71-227_sm.pdf [file pjm-71-227_sm.pdf]

Supplementary materials for the article:

Chen H. et al. Oral microbiota, a potential determinant for the treatment efficacy of gastric

*Helicobacter pylori* eradication in humans.

Pol J Microbiol. 2022, Vol. 71, No. 2, 227–239

Table SI

Clinical characteristics of the sixteen volunteers.

| Characteristic | SE (n = 7)   | FE (n = 9)  |
|----------------|--------------|-------------|
| Male/Female    | 3/4          | 3/6         |
| Age (years)    | 52.4 ± 14.7  | 51.7 ± 11.7 |
| DOB value      | 0.13 ± 1.23* | 21.6 ± 23.6 |

SE – patients with successful eradication therapy

FE – patients with failed eradication therapy

\* –  $p < 0.05$

Table SII

General information for the 16s rRNA gene sequencing.

|          | Optimized sequence | Sequence bases          |
|----------|--------------------|-------------------------|
| SE group | 66,897 ± 6,449*    | 28,327,070 ± 2,694,126* |
| FE group | 58,102 ± 6,281     | 24,526,063 ± 2,659,840  |

SE – patients with successful eradication therapy

FE – patients with failed eradication therapy

\* –  $p < 0.05$

Table SIII  
 Represented bacteria taxa information (genus, species, and phylum) of these OTUs from Venn analysis.

| ID     | SE1   | SE2        | SE3   | SE4   | SE5        | SE6       | SE7   | FE1   | FE2 | FE3   | FE4 | FE5   | FE6 | FE7 | FE8 | FE9 | Phylum             | Genus                                 | Species                                               |
|--------|-------|------------|-------|-------|------------|-----------|-------|-------|-----|-------|-----|-------|-----|-----|-----|-----|--------------------|---------------------------------------|-------------------------------------------------------|
| OTU439 | 0     | 0          | 0     | 0     | 0          | 0         | 4E-05 | 0     | 0   | 0     | 0   | 0     | 0   | 0   | 0   | 0   | Euryarchaeota      | Methanomethylovorans                  | uncultured Methanomethylovorans sp.                   |
| OTU382 | 0     | 0          | 0     | 0     | 1,3882E-05 | 0         | 0     | 0     | 0   | 0     | 0   | 0     | 0   | 0   | 0   | 0   | Bacteroidetes      | norank                                |                                                       |
| OTU352 | 0     | 0          | 0     | 2E-04 | 5,5528E-05 | 0         | 0     | 0     | 0   | 0     | 0   | 0     | 0   | 0   | 0   | 0   | Bacteroidetes      | Prevotella 7                          | uncultured bacterium                                  |
| OTU396 | 3E-05 | 0          | 0     | 0     | 0          | 0         | 1E-04 | 0     | 0   | 0     | 0   | 0     | 0   | 0   | 0   | 0   | Bacteroidetes      | Prevotella 7                          | uncultured bacterium                                  |
| OTU442 | 0     | 0          | 0     | 0     | 4,1646E-05 | 0         | 0     | 0     | 0   | 0     | 0   | 0     | 0   | 0   | 0   | 0   | Bacteroidetes      | Prevotella 7                          | uncultured bacterium                                  |
| OTU332 | 2E-04 | 0          | 0     | 0     | 0          | 0         | 0     | 0     | 0   | 0     | 0   | 0     | 0   | 0   | 0   | 0   | Bacteroidetes      | Prevotella 9                          | uncultured bacterium                                  |
| OTU395 | 4E-05 | 0          | 0     | 2E-05 | 0          | 0         | 0     | 0     | 0   | 0     | 0   | 0     | 0   | 0   | 0   | 0   | Bacteroidetes      | Prevotellaceae Ga6A1 group            | uncultured bacterium                                  |
| OTU448 | 3E-05 | 0          | 0     | 2E-05 | 0          | 0         | 0     | 0     | 0   | 0     | 0   | 0     | 0   | 0   | 0   | 0   | Bacteroidetes      | norank                                | uncultured bacterium                                  |
| OTU457 | 3E-05 | 0          | 0     | 0     | 0          | 0         | 0     | 0     | 0   | 0     | 0   | 0     | 0   | 0   | 0   | 0   | Bacteroidetes      | norank                                | uncultured bacterium                                  |
| OTU423 | 0     | 4,5789E-05 | 0     | 0     | 0          | 0         | 1E-05 | 0     | 0   | 0     | 0   | 0     | 0   | 0   | 0   | 0   | Bacteroidetes      | Sediminibacterium                     | uncultured bacterium                                  |
| OTU443 | 0     | 0          | 0     | 0     | 0          | 0         | 1E-05 | 0     | 0   | 0     | 0   | 0     | 0   | 0   | 0   | 0   | Cyanobacteria      | norank                                | uncultured bacterium                                  |
| OTU318 | 1E-05 | 0          | 0     | 0     | 0          | 0         | 0     | 0     | 0   | 0     | 0   | 0     | 0   | 0   | 0   | 0   | Actinobacteria     | Cellulosimicrobium                    | Cellulosimicrobium cellulans                          |
| OTU405 | 0     | 0          | 0     | 0     | 1,3882E-05 | 1,803E-05 | 0     | 0     | 0   | 0     | 0   | 0     | 0   | 0   | 0   | 0   | Actinobacteria     | Actinomyces                           | uncultured bacterium                                  |
| OTU363 | 3E-05 | 0          | 1E-04 | 0     | 0          | 0         | 4E-05 | 0     | 0   | 0     | 0   | 0     | 0   | 0   | 0   | 0   | Actinobacteria     | Alloscardovia                         | Alloscardovia omnicoles                               |
| OTU379 | 1E-04 | 0          | 0     | 0     | 0          | 0         | 1E-05 | 0     | 0   | 0     | 0   | 0     | 0   | 0   | 0   | 0   | Actinobacteria     | Bifidobacterium                       | Bifidobacterium longum subsp. longum                  |
| OTU455 | 0     | 0          | 0     | 0     | 0          | 0         | 1E-05 | 0     | 0   | 0     | 0   | 0     | 0   | 0   | 0   | 0   | Actinobacteria     | Nesterenkonia                         |                                                       |
| OTU451 | 3E-05 | 0          | 0     | 0     | 0          | 0         | 0     | 0     | 0   | 0     | 0   | 0     | 0   | 0   | 0   | 0   | Actinobacteria     | Olsenella                             |                                                       |
| OTU434 | 3E-05 | 1,5263E-05 | 0     | 0     | 0          | 0         | 0     | 0     | 0   | 0     | 0   | 0     | 0   | 0   | 0   | 0   | Proteobacteria     | Enhydrobacter                         |                                                       |
| OTU422 | 0     | 0          | 0     | 0     | 0          | 0         | 4E-05 | 0     | 0   | 0     | 0   | 0     | 0   | 0   | 0   | 0   | Proteobacteria     | Reyranela                             |                                                       |
| OTU447 | 0     | 0          | 0     | 0     | 0          | 0         | 4E-05 | 0     | 0   | 0     | 0   | 0     | 0   | 0   | 0   | 0   | Proteobacteria     | alphaI cluster                        | uncultured bacterium                                  |
| OTU409 | 0     | 6,1052E-05 | 0     | 0     | 0          | 0         | 1E-05 | 0     | 0   | 0     | 0   | 0     | 0   | 0   | 0   | 0   | Proteobacteria     |                                       |                                                       |
| OTU346 | 0     | 0          | 0     | 3E-04 | 0          | 0         | 0     | 0     | 0   | 0     | 0   | 0     | 0   | 0   | 0   | 0   | Firmicutes         | Megasphaera                           | uncultured bacterium                                  |
| OTU401 | 1E-05 | 3,0526E-05 | 0     | 0     | 0          | 0         | 0     | 0     | 0   | 0     | 0   | 0     | 0   | 0   | 0   | 0   | Firmicutes         | Bacillus                              |                                                       |
| OTU413 | 1E-05 | 0          | 0     | 0     | 0          | 0         | 0     | 0     | 0   | 0     | 0   | 0     | 0   | 0   | 0   | 0   | Firmicutes         | Bacillus                              | Bacillus thuringiensis serovar kurstaki str. YBT-1520 |
| OTU271 | 2E-04 | 0          | 0     | 2E-05 | 0          | 0         | 6E-04 | 0     | 0   | 0     | 0   | 0     | 0   | 0   | 0   | 0   | Firmicutes         | Lactobacillus                         |                                                       |
| OTU453 | 0     | 0          | 0     | 0     | 0          | 0         | 3E-05 | 0     | 0   | 0     | 0   | 0     | 0   | 0   | 0   | 0   | Firmicutes         | Finegoldia                            | uncultured bacterium                                  |
| OTU438 | 0     | 4,5789E-05 | 0     | 0     | 0          | 0         | 0     | 0     | 0   | 0     | 0   | 0     | 0   | 0   | 0   | 0   | Firmicutes         | Lachnospiraceae NK4A136 group         | uncultured bacterium                                  |
| OTU441 | 0     | 0          | 0     | 0     | 0          | 0         | 4E-05 | 0     | 0   | 0     | 0   | 0     | 0   | 0   | 0   | 0   | Firmicutes         | Faecalibacterium                      | uncultured bacterium                                  |
| OTU449 | 1E-05 | 1,5263E-05 | 0     | 0     | 0          | 0         | 0     | 0     | 0   | 0     | 0   | 0     | 0   | 0   | 0   | 0   | Firmicutes         | [Eubacterium] coprostanoligenes group | uncultured bacterium                                  |
| OTU314 | 0     | 0          | 0     | 0     | 0          | 0         | 0     | 0     | 0   | 0     | 0   | 0     | 0   | 0   | 0   | 0   | Spirochaetes       | Treponema 2                           | Treponema genomsp. P4 oral clone MB2_G19              |
| OTU339 | 0     | 0          | 0     | 0     | 0          | 0         | 0     | 0     | 0   | 0     | 0   | 0     | 0   | 0   | 0   | 0   | Spirochaetes       | Treponema 2                           | uncultured bacterium                                  |
| OTU369 | 0     | 0          | 0     | 0     | 0          | 0         | 0     | 0     | 0   | 0     | 0   | 0     | 0   | 0   | 0   | 0   | Spirochaetes       | Treponema 2                           | uncultured Treponema sp.                              |
| OTU394 | 0     | 0          | 0     | 0     | 0          | 0         | 0     | 0     | 0   | 0     | 0   | 0     | 0   | 0   | 0   | 0   | Spirochaetes       | Treponema 2                           |                                                       |
| OTU406 | 0     | 0          | 0     | 0     | 0          | 0         | 0     | 0     | 0   | 4E-05 | 0   | 3E-05 | 0   | 0   | 0   | 0   | Spirochaetes       | Treponema 2                           | Treponema parvum                                      |
| OTU373 | 0     | 0          | 0     | 0     | 0          | 0         | 0     | 2E-05 | 0   | 2E-05 | 0   | 0     | 0   | 0   | 0   | 0   | Patescibacteria    | norank                                |                                                       |
| OTU295 | 0     | 0          | 0     | 0     | 0          | 0         | 0     | 0     | 0   | 0     | 0   | 0     | 0   | 0   | 0   | 0   | Epsilonbacteraeota | norank                                | uncultured bacterium                                  |

| ID     | SE1 | SE2 | SE3 | SE4 | SE5 | SE6 | SE7 | FE1   | FE2 | FE3   | FE4   | FE5   | FE6 | FE7   | FE8 | FE9   | Phylum          | Genus                         | Species                                |
|--------|-----|-----|-----|-----|-----|-----|-----|-------|-----|-------|-------|-------|-----|-------|-----|-------|-----------------|-------------------------------|----------------------------------------|
| OTU435 | 0   | 0   | 0   | 0   | 0   | 0   | 0   | 0     | 0   | 0     | 0     | 0     | 0   | 4E-05 | 0   | 4E-05 | Patescibacteria | norank                        | uncultured bacterium                   |
| OTU320 | 0   | 0   | 0   | 0   | 0   | 0   | 0   | 0     | 0   | 4E-05 | 4E-05 | 0     | 0   | 0     | 0   | 0     | Patescibacteria | Candidatus Saccharimonas      | uncultured bacterium                   |
| OTU196 | 0   | 0   | 0   | 0   | 0   | 0   | 0   | 0     | 0   | 0     | 0     | 0     | 0   | 0     | 0   | 0     | Bacteroidetes   | norank                        | uncultured bacterium                   |
| OTU452 | 0   | 0   | 0   | 0   | 0   | 0   | 0   | 0     | 0   | 0     | 0     | 0     | 0   | 0     | 0   | 0     | Bacteroidetes   | Odoribacter                   |                                        |
| OTU321 | 0   | 0   | 0   | 0   | 0   | 0   | 0   | 0     | 0   | 0     | 0     | 0     | 0   | 0     | 0   | 8E-05 | Bacteroidetes   | Porphyromonas                 | Porphyromonas uenonis                  |
| OTU398 | 0   | 0   | 0   | 0   | 0   | 0   | 0   | 0     | 0   | 0     | 0     | 0     | 0   | 0     | 0   | 0     | Bacteroidetes   | Phocaeicola                   | Phocaeicola abscessus                  |
| OTU432 | 0   | 0   | 0   | 0   | 0   | 0   | 0   | 0     | 0   | 6E-05 | 0     | 0     | 0   | 0     | 0   | 0     | Bacteroidetes   | Bacteroides                   | Prevotella heparinolytica              |
| OTU370 | 0   | 0   | 0   | 0   | 0   | 0   | 0   | 0     | 0   | 0     | 0     | 0     | 0   | 0     | 0   | 0     | Bacteroidetes   | Prevotella                    |                                        |
| OTU371 | 0   | 0   | 0   | 0   | 0   | 0   | 0   | 0     | 0   | 0     | 0     | 0     | 0   | 7E-05 | 0   | 0     | Bacteroidetes   | Prevotella 7                  | uncultured bacterium                   |
| OTU418 | 0   | 0   | 0   | 0   | 0   | 0   | 0   | 0     | 0   | 0     | 0     | 0     | 0   | 0     | 0   | 1E-04 | Bacteroidetes   | Prevotella 2                  | uncultured Prevotella sp.              |
| OTU263 | 0   | 0   | 0   | 0   | 0   | 0   | 0   | 9E-05 | 0   | 0     | 0     | 2E-05 | 0   | 0     | 0   | 0     | Bacteroidetes   | Prevotella                    | uncultured bacterium                   |
| OTU306 | 0   | 0   | 0   | 0   | 0   | 0   | 0   | 0     | 0   | 4E-05 | 0     | 0     | 0   | 0     | 0   | 0     | Bacteroidetes   | norank                        | uncultured bacterium                   |
| OTU174 | 0   | 0   | 0   | 0   | 0   | 0   | 0   | 2E-05 | 0   | 6E-05 | 9E-05 | 0     | 0   | 0     | 0   | 7E-04 | Bacteroidetes   | Bergeyella                    | uncultured bacterium                   |
| OTU458 | 0   | 0   | 0   | 0   | 0   | 0   | 0   | 0     | 0   | 2E-05 | 0     | 0     | 0   | 0     | 0   | 0     | Patescibacteria | norank                        | SR1 bacterium human oral taxon HOT-345 |
| OTU425 | 0   | 0   | 0   | 0   | 0   | 0   | 0   | 0     | 0   | 0     | 0     | 0     | 0   | 0     | 0   | 0     | Actinobacteria  | Actinomyces                   | Actinomyces weissii                    |
| OTU359 | 0   | 0   | 0   | 0   | 0   | 0   | 0   | 0     | 0   | 2E-05 | 2E-05 | 1E-04 | 0   | 0     | 0   | 0     | Actinobacteria  | Corynebacterium               | uncultured bacterium                   |
| OTU276 | 0   | 0   | 0   | 0   | 0   | 0   | 0   | 3E-04 | 0   | 0     | 0     | 0     | 0   | 0     | 0   | 0     | Fusobacteria    | Leptotrichia                  | uncultured bacterium                   |
| OTU267 | 0   | 0   | 0   | 0   | 0   | 0   | 0   | 0     | 0   | 0     | 0     | 0     | 0   | 0     | 0   | 0     | Proteobacteria  |                               |                                        |
| OTU400 | 0   | 0   | 0   | 0   | 0   | 0   | 0   | 0     | 0   | 0     | 0     | 0     | 0   | 0     | 0   | 0     | Proteobacteria  | uncultured                    | uncultured rumen bacterium             |
| OTU312 | 0   | 0   | 0   | 0   | 0   | 0   | 0   | 0     | 0   | 0     | 0     | 0     | 0   | 0     | 0   | 0     | Proteobacteria  | Simonsiella                   | Simonsiella muelleri ATCC 29453        |
| OTU250 | 0   | 0   | 0   | 0   | 0   | 0   | 0   | 0     | 0   | 0     | 5E-04 | 0     | 0   | 0     | 0   | 0     | Proteobacteria  |                               |                                        |
| OTU187 | 0   | 0   | 0   | 0   | 0   | 0   | 0   | 0     | 0   | 0     | 0     | 0     | 0   | 0     | 0   | 0     | Proteobacteria  | Pseudomonas                   |                                        |
| OTU428 | 0   | 0   | 0   | 0   | 0   | 0   | 0   | 0     | 0   | 0     | 0     | 0     | 0   | 0     | 0   | 0     | Proteobacteria  | Cobetia                       | Cobetia marina                         |
| OTU278 | 0   | 0   | 0   | 0   | 0   | 0   | 0   | 0     | 0   | 0     | 9E-04 | 0     | 0   | 0     | 0   | 0     | Proteobacteria  | Moraxella                     | uncultured bacterium                   |
| OTU245 | 0   | 0   | 0   | 0   | 0   | 0   | 0   | 0     | 0   | 1E-04 | 0     | 0     | 0   | 0     | 0   | 0     | Proteobacteria  | Cardiobacterium               | uncultured bacterium                   |
| OTU408 | 0   | 0   | 0   | 0   | 0   | 0   | 0   | 0     | 0   | 0     | 0     | 0     | 0   | 0     | 0   | 0     | Proteobacteria  | norank                        | uncultured bacterium                   |
| OTU433 | 0   | 0   | 0   | 0   | 0   | 0   | 0   | 0     | 0   | 0     | 0     | 0     | 0   | 0     | 0   | 0     | Proteobacteria  | norank                        |                                        |
| OTU436 | 0   | 0   | 0   | 0   | 0   | 0   | 0   | 0     | 0   | 0     | 0     | 0     | 0   | 0     | 0   | 0     | Proteobacteria  | Mesorhizobium                 |                                        |
| OTU399 | 0   | 0   | 0   | 0   | 0   | 0   | 0   | 0     | 0   | 0     | 0     | 0     | 0   | 0     | 0   | 0     | Proteobacteria  | Nitratireductor               |                                        |
| OTU403 | 0   | 0   | 0   | 0   | 0   | 0   | 0   | 0     | 0   | 0     | 0     | 1E-04 | 0   | 0     | 0   | 0     | Firmicutes      | Christensenellaceae R-7 group |                                        |
| OTU392 | 0   | 0   | 0   | 0   | 0   | 0   | 0   | 0     | 0   | 0     | 0     | 2E-05 | 0   | 0     | 0   | 0     | Firmicutes      | Dialister                     | uncultured organism                    |
| OTU388 | 0   | 0   | 0   | 0   | 0   | 0   | 0   | 0     | 0   | 0     | 0     | 0     | 0   | 0     | 0   | 0     | Firmicutes      | Selenomonas                   | uncultured bacterium                   |
| OTU416 | 0   | 0   | 0   | 0   | 0   | 0   | 0   | 0     | 0   | 0     | 0     | 0     | 0   | 2E-05 | 0   | 8E-05 | Firmicutes      | Solobacterium                 | uncultured bacterium                   |
| OTU372 | 0   | 0   | 0   | 0   | 0   | 0   | 0   | 0     | 0   | 0     | 0     | 0     | 0   | 0     | 0   | 0     | Firmicutes      | Erysipelotrichaceae UCG-004   | uncultured bacterium                   |
| OTU317 | 0   | 0   | 0   | 0   | 0   | 0   | 0   | 0     | 0   | 0     | 0     | 0     | 0   | 0     | 0   | 0     | Firmicutes      | Ezakiella                     |                                        |
| OTU254 | 0   | 0   | 0   | 0   | 0   | 0   | 0   | 0     | 0   | 0     | 0     | 0     | 0   | 0     | 0   | 0     | Firmicutes      | Peptoniphilus                 |                                        |
| OTU389 | 0   | 0   | 0   | 0   | 0   | 0   | 0   | 0     | 0   | 0     | 0     | 0     | 0   | 0     | 0   | 0     | Firmicutes      | Murdochiella                  | uncultured bacterium                   |
| OTU171 | 0   | 0   | 0   | 0   | 0   | 0   | 0   | 0     | 0   | 0     | 0     | 3E-04 | 0   | 4E-04 | 0   | 0     | Firmicutes      | [Eubacterium] saphenum group  | Eubacterium saphenum ATCC 49989        |
| OTU374 | 0   | 0   | 0   | 0   | 0   | 0   | 0   | 0     | 0   | 0     | 0     | 0     | 0   | 0     | 0   | 0     | Firmicutes      | Anaerovorax                   | uncultured bacterium                   |

| ID     | SE1 | SE2 | SE3 | SE4 | SE5 | SE6 | SE7 | FE1   | FE2 | FE3   | FE4   | FE5   | FE6 | FE7 | FE8 | FE9   | Phylum          | Genus                        | Species                    |
|--------|-----|-----|-----|-----|-----|-----|-----|-------|-----|-------|-------|-------|-----|-----|-----|-------|-----------------|------------------------------|----------------------------|
| OTU446 | 0   | 0   | 0   | 0   | 0   | 0   | 0   | 0     | 0   | 0     | 0     | 0     | 0   | 0   | 0   | 0     | Firmicutes      | Syntrophomonas               | Syntrophomonas palmitatica |
| OTU366 | 0   | 0   | 0   | 0   | 0   | 0   | 0   | 0     | 0   | 0     | 0     | 0     | 0   | 0   | 0   | 0     | Proteobacteria  | Desulfomicrobium             | Desulfomicrobium orale     |
| OTU357 | 0   | 0   | 0   | 0   | 0   | 0   | 0   | 0     | 0   | 0     | 0     | 0     | 0   | 0   | 0   | 0     | Proteobacteria  | Desulfovibrio                | uncultured bacterium       |
| OTU424 | 0   | 0   | 0   | 0   | 0   | 0   | 0   | 0     | 0   | 0     | 0     | 0     | 0   | 0   | 0   | 0     | Proteobacteria  | Desulfovibrio                |                            |
| OTU353 | 0   | 0   | 0   | 0   | 0   | 0   | 0   | 0     | 0   | 1E-04 | 0     | 0     | 0   | 0   | 0   | 0     | Tenericutes     | Acholeplasma                 | uncultured bacterium       |
| OTU386 | 0   | 0   | 0   | 0   | 0   | 0   | 0   | 0     | 0   | 0     | 0     | 0     | 0   | 0   | 0   | 0     | Tenericutes     | Mycoplasma                   | Mycoplasma lipophilum      |
| OTU281 | 0   | 0   | 0   | 0   | 0   | 0   | 0   | 6E-05 | 0   | 0     | 0     | 0     | 0   | 0   | 0   | 0     | Firmicutes      | norank                       | uncultured bacterium       |
| OTU450 | 0   | 0   | 0   | 0   | 0   | 0   | 0   | 0     | 0   | 0     | 0     | 0     | 0   | 0   | 0   | 0     | Patescibacteria | norank                       | uncultured bacterium       |
| OTU358 | 0   | 0   | 0   | 0   | 0   | 0   | 0   | 2E-05 | 0   | 0     | 4E-05 | 5E-05 | 0   | 0   | 0   | 0     | Firmicutes      | Lachnospiraceae NK3A20 group |                            |
| OTU454 | 0   | 0   | 0   | 0   | 0   | 0   | 0   | 0     | 0   | 0     | 0     | 0     | 0   | 0   | 0   | 4E-05 | Firmicutes      | Ruminococcaceae UCG-014      | uncultured organism        |
| OTU241 | 0   | 0   | 0   | 0   | 0   | 0   | 0   | 0     | 0   | 0     | 0     | 0     | 0   | 0   | 0   | 0     | Firmicutes      | Ruminococcaceae UCG-014      | uncultured bacterium       |
| OTU202 | 0   | 0   | 0   | 0   | 0   | 0   | 0   | 0     | 0   | 0     | 0     | 0     | 0   | 0   | 0   | 0     | Firmicutes      | Ruminococcaceae UCG-014      |                            |
| OTU186 | 0   | 0   | 0   | 0   | 0   | 0   | 0   | 0     | 0   | 0     | 0     | 0     | 0   | 0   | 0   | 0     | Firmicutes      | Ruminococcaceae UCG-014      | uncultured bacterium       |
